# Supplementary material for: Water desalination by electrical resonance inside carbon nanotubes
Source: Royal Society of Chemistry journal article supplement (doi:10.1039/c6cp04201e), 2016-01-01
Supplement: c6cp04201e1.pdf [file c6cp04201e1.pdf]

## Supporting Information

# Water Desalination by Electrical Resonance inside Carbon Nanotube

Jia-wei Feng,<sup>a</sup> Hong-ming Ding,<sup>\*b</sup> and Yu-qiang Ma<sup>\*ab</sup>

<sup>a</sup> National Laboratory of Solid State Microstructures and Department of Physics, Collaborative Innovation Center of Advanced Microstructures, Nanjing University, Nanjing 210093, China

<sup>b</sup> Center for Soft Condensed Matter Physics and Interdisciplinary Research, Soochow University, Suzhou 215006, China.

\* E-mail: dinghm@suda.edu.cn; myqiang@nju.edu.cn

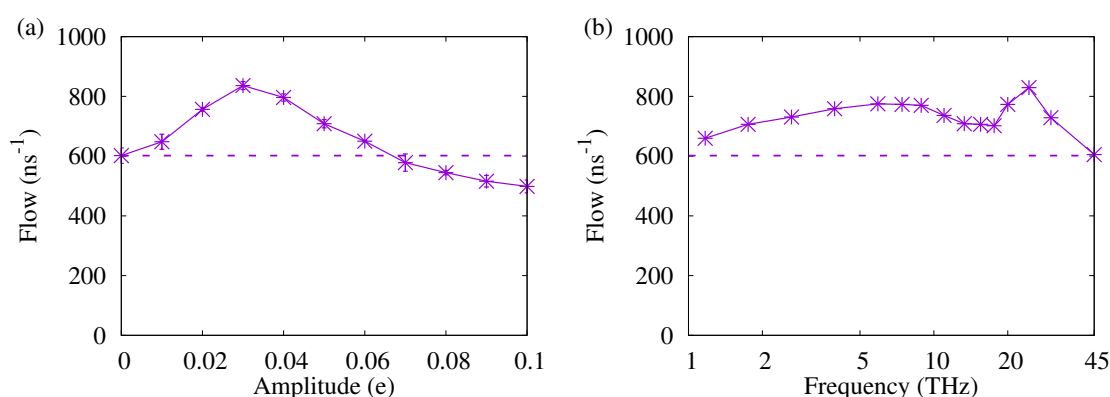

**Fig. S 1** (a) Water flow as a function of  $q_0$  when  $f$  is fixed at 13.3 THz. (b) Water flow as a function of  $f$  when  $q_0$  is fixed at 0.05  $e$ . Dashed lines indicate the value of water flow inside a neutral CNT.

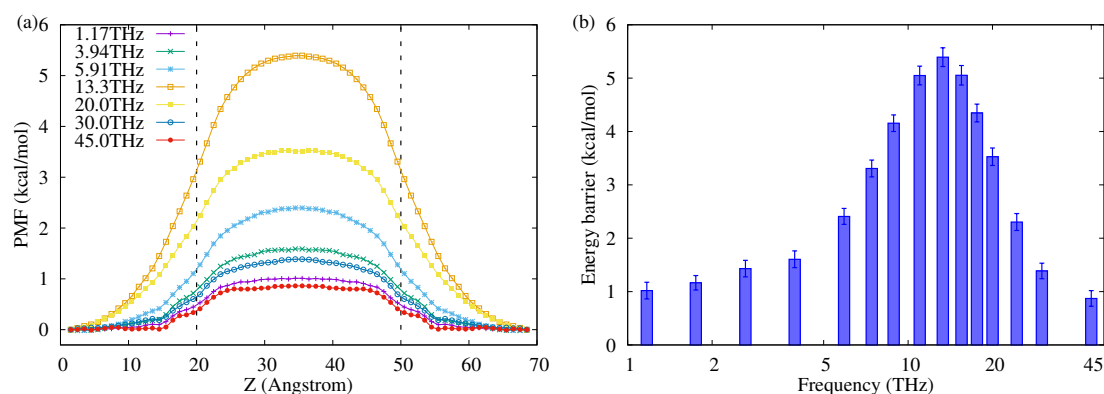

**Fig. S 2** (a) PMF of  $\text{Cl}^-$  when  $q_0 = 0.05 e$ . (b) Energy barrier of  $\text{Cl}^-$  as a function of frequency when  $q_0 = 0.05 e$ . Dotted lines in (a) represent the position of CNT.

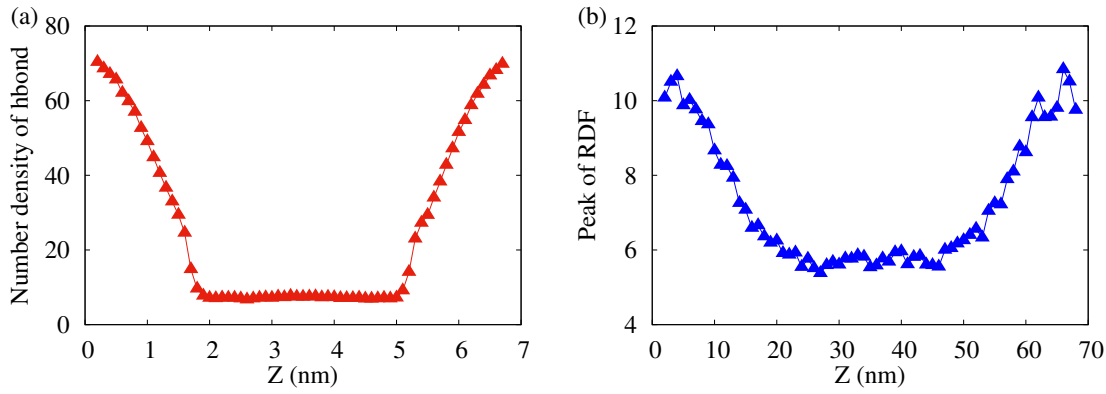

**Fig. S 3** (a) Number density of hydrogen bond and (b) peak of RDF as a function of Z in (20,0) CNT with vibrational charge  $q_0 = 0.05 e$  and  $f = 13.3 \text{ THz}$ .

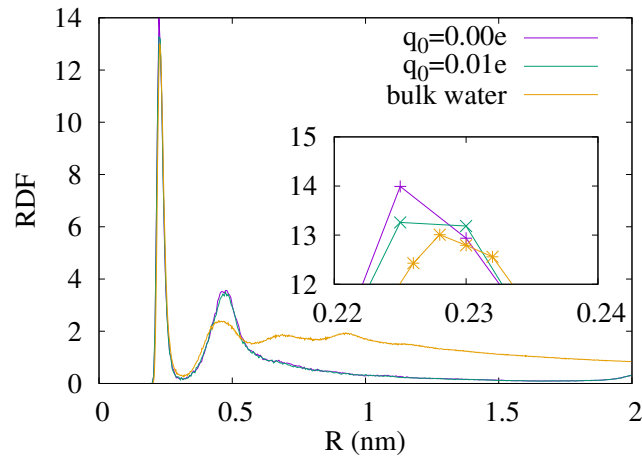

**Fig. S 4** RDF of water around  $\text{Na}^+$  in the case of  $q_0 = 0.00 e$ ,  $q_0 = 0.01 e$  and in bulk water. Inset shows a close view around the peak of RDF.

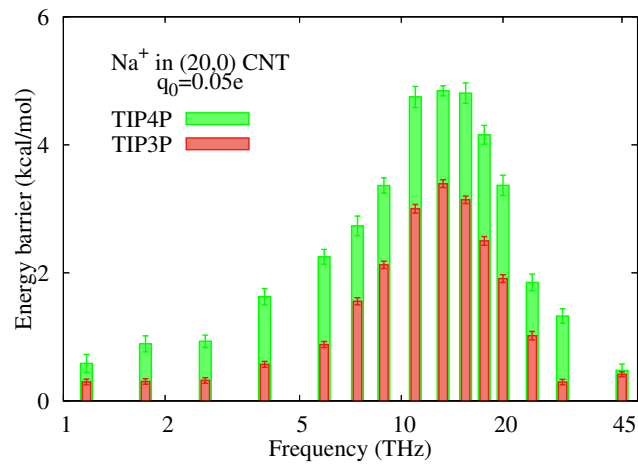

**Fig. S 5** Comparison of energy barrier between TIP3P and TIP4P water models.

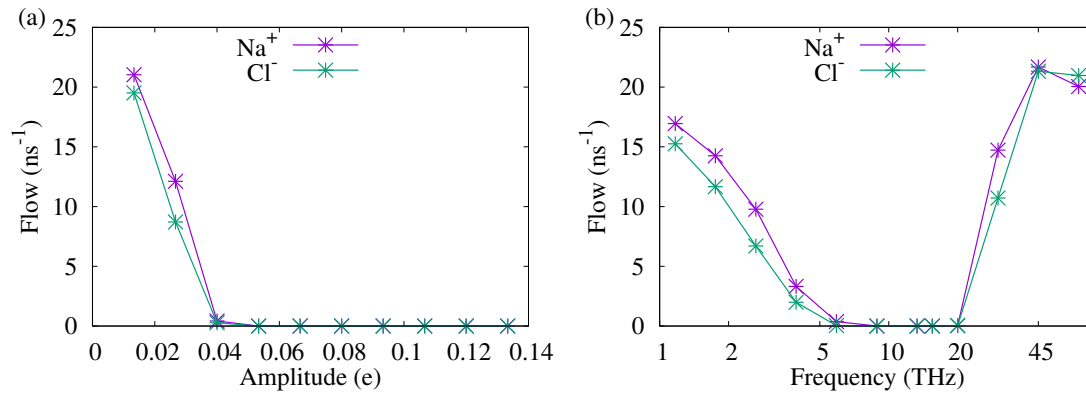

**Fig. S 6** (a) Ion flow inside (30,0) CNT as a function of  $q_0$  when  $f$  is fixed at 13.3 THz. (b) Ion flow inside (30,0) CNT as a function of  $f$  when  $q_0$  is fixed at 0.0667 e.
